# Supplementary material for: Evaluation of Adjunctive Ultrasonography for Breast Cancer Detection Among Women Aged 40-49 Years With Varying Breast Density Undergoing Screening Mammography: A Secondary Analysis of a Randomized Clinical Trial
Source: PubMed Central journal article supplement (PMC8374606; doi:10.1001/jamanetworkopen.2021.21505), 2021-08-18
Supplement: jamanetwopen-e2121505-s003.pdf [file jamanetwopen-e2121505-s003.pdf]

## Data Sharing Statement

Harada-Shoji. Evaluation of Adjunctive Ultrasonography for Breast Cancer Detection Among Women Aged 40-49 Years With Varying Breast Density Undergoing Screening Mammography. *JAMA Netw Open*. Published August 18, 2021.  
doi:10.1001/jamanetworkopen.2021.21505

### Data

**Data available:** Yes

**Data types:** Deidentified participant data

**How to access data:** <http://www.j-start.org/>

**When available:** With publication

### Supporting Documents

**Document types:** None

### Additional Information

**Who can access the data:** Noriaki Ohuchi, MD, PhD

<[noriaki-ohuchi@med.tohoku.ac.jp](mailto:noriaki-ohuchi@med.tohoku.ac.jp)>

**Types of analyses:** for any purpose

**Mechanisms of data availability:** with investigator support
